# Supplementary material for: A post-synthetically modified Eu@Zn-MOF for ratiometric fluorescence detection of tetracycline in tap water
Source: Royal Society of Chemistry journal article supplement (doi:10.1039/d3nj03415a), 2023-01-01
Supplement: d3nj03415a1.pdf [file d3nj03415a1.pdf]

Electronic Supporting Information (ESI):

## A post-synthetic modified Eu@Zn-MOFs for ratiometric fluorescent detection of tetracycline in tap water

Renwen Zhang, Lingyan Ma, Wenjing Qi, Chun Liu\*

College of Chemistry, Chongqing Normal University, Chongqing 401331, P. R. China.

\*Corresponding author. E-mail: wliuchun79@126.com (C. Liu); Tel:+86-23-65362777.

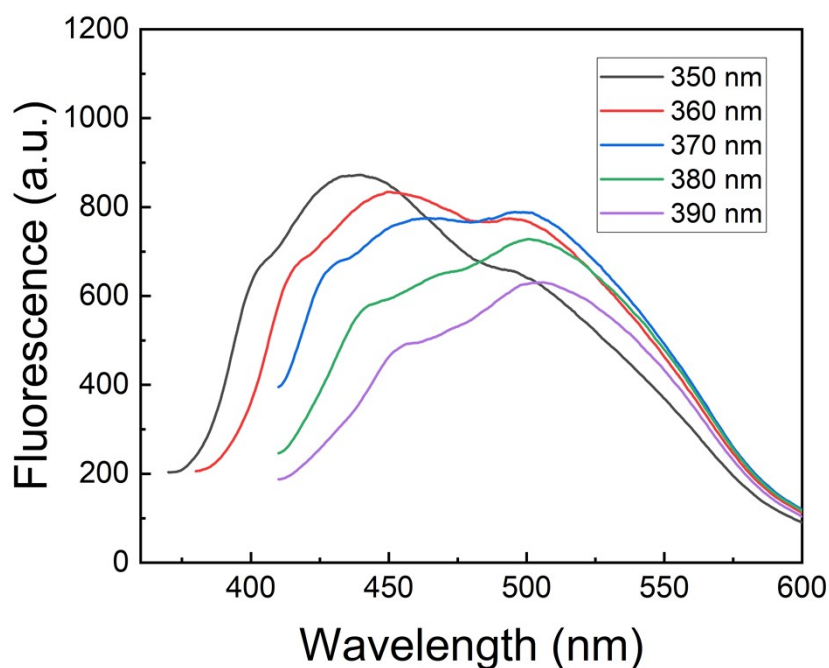

**Figure S1** The fluorescence emission spectrum of tetracycline. Tris-HCl buffer: pH 9.0;  $c(\text{tetracycline})$ : 22.5  $\mu\text{M}$ .

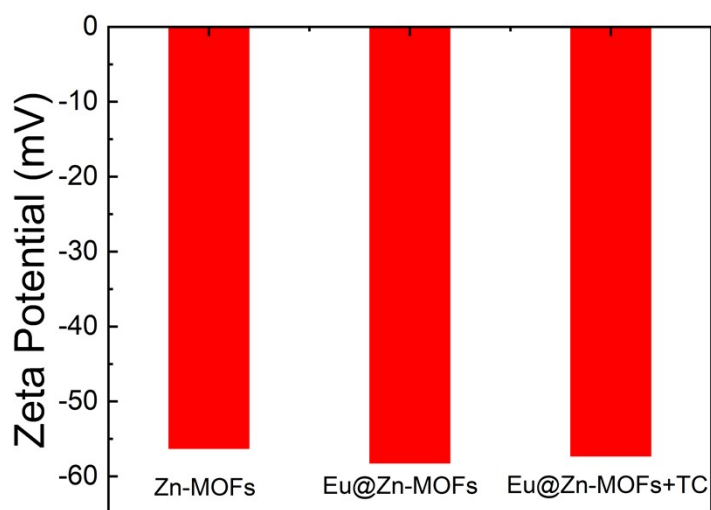

**Figure S2** Zeta potential of Zn-MOFs, Eu@Zn-MOFs and Eu@Zn-MOFs + tetracycline. TC: tetracycline.

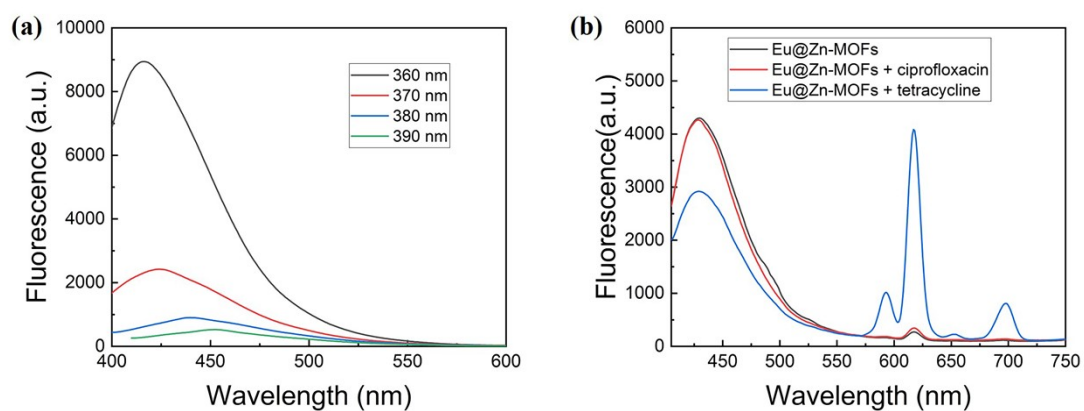

**Figure S3** (a) The fluorescence spectra of ciprofloxacin. (b) The Fluorescence spectra of Eu@Zn-MOFs, Eu@Zn-MOFs + ciprofloxacin, Eu@Zn-MOFs + tetracycline under 390 nm excitation. Tris-HCl buffer: pH 9.0;  $c(\text{Eu@Zn-MOFs})$ : 20  $\mu\text{g/mL}$ ;  $c(\text{ciprofloxacin})$ : 100  $\mu\text{M}$ ;  $c(\text{tetracycline})$ : 10  $\mu\text{M}$ .
